# Supplementary material for: Randomized Trial on the Effects of Dietary Potassium on Blood Pressure and Serum Potassium Levels in Adults with Chronic Kidney Disease
Source: MDPI journal article supplement (doi:10.3390/nu13082678), 2021-07-31
Supplement: s1 [file s1]

**Table S1.** Complete List of Trial Exclusions.

|                                                                                                                                         |                                                                                                                                                          |
|-----------------------------------------------------------------------------------------------------------------------------------------|----------------------------------------------------------------------------------------------------------------------------------------------------------|
| <b>Major inclusion criteria</b>                                                                                                         |                                                                                                                                                          |
| •                                                                                                                                       | Age $\geq$ 18                                                                                                                                            |
| •                                                                                                                                       | Estimated GFR between 30-59 mL/min/1.73m <sup>2</sup> by the 4-variable Modification of Diet in Renal Disease (MDRD) study equation                      |
| •                                                                                                                                       | Screening systolic BP 120-159 mmHg and diastolic BP < 100 mmHg                                                                                           |
| •                                                                                                                                       | Willingness to follow strict dietary rules for 13 weeks and to come to the clinical research unit each weekday for one meal during the two study periods |
| <b>Major exclusion criteria</b>                                                                                                         |                                                                                                                                                          |
| •                                                                                                                                       | Screening serum K $\geq$ 5 mmol/L (or history of hyperkalemia) or < 3.5 mmol/L                                                                           |
| •                                                                                                                                       | Insulin-requiring or uncontrolled (HbA1C >8.0%) diabetes mellitus                                                                                        |
| •                                                                                                                                       | Use of K supplements                                                                                                                                     |
| •                                                                                                                                       | Use of digoxin                                                                                                                                           |
| •                                                                                                                                       | Cardiovascular event < 6 months ago, symptomatic ischemic heart disease, or congestive heart failure                                                     |
| •                                                                                                                                       | Body mass index > 40 kg/m <sup>2</sup>                                                                                                                   |
| •                                                                                                                                       | Chronic disease(s) that might interfere with trial participation                                                                                         |
| •                                                                                                                                       | Pregnancy or lactation                                                                                                                                   |
| •                                                                                                                                       | 14 or more alcoholic drinks/week                                                                                                                         |
| •                                                                                                                                       | Major food allergies                                                                                                                                     |
| <b>Maintenance medications (allowed because we expect that individuals with this stage of CKD may commonly be on these medications)</b> |                                                                                                                                                          |
| •                                                                                                                                       | Anti-hypertensive and lipid-lowering therapies were allowed if participants had been on a stable dose for at least two months                            |
| •                                                                                                                                       | Diuretics were allowed if participants had been on a stable dose for at least two months                                                                 |

**Table S2.** Nutrient Targets by Calorie Level.

| Nutrient                     | Calorie level (kcal) |           |           |
|------------------------------|----------------------|-----------|-----------|
|                              | 1600                 | 2000      | 2400      |
| Protein (g)                  | 52                   | 65        | 78        |
| Carbohydrate (g)             | 200                  | 250       | 300       |
| Fat (g)                      | 66                   | 82        | 99        |
| K (mg) (Lower, Higher)       | 1300/3600            | 1600/3900 | 1900/4200 |
| Na (mg)                      | 2640                 | 3300      | 3960      |
| Phosphorus (mg)              | 1000                 | 1000      | 1000      |
| Fiber (gm)                   | 25+                  | 25+       | 25+       |
| Saturated Fat (% kcal)       | 8                    | 8         | 8         |
| Polyunsaturated Fat (% kcal) | 12                   | 12        | 12        |
| Monounsaturated Fat (% kcal) | 10                   | 10        | 10        |

**Table S3.** Effects of Increasing Potassium on Blood Pressure by Week as well as Weekly Change from Baseline.

| Difference in mm Hg, High versus Low K (95% CI) |    |                     |                     |                     |                     |                        |                       |               |
|-------------------------------------------------|----|---------------------|---------------------|---------------------|---------------------|------------------------|-----------------------|---------------|
|                                                 | N  | Week 1              | Week 2              | Week 3              | Week 4              | Weekly Change - High K | Weekly Change - Low K | P-interaction |
| Clinic SBP, mm Hg                               | 25 | -0.96 (-6.84, 4.92) | -2.51 (-7.78, 2.76) | -2.36 (-6.47, 1.75) | -4.21 (-8.49, 0.07) | -0.64 (-2.08, 0.80)    | 0.33 (-1.19, 1.84)    | 0.34          |
| Clinic DBP, mm Hg                               | 25 | 0.81 (-1.99, 3.61)  | -0.68 (-3.23, 1.87) | -0.01 (-2.26, 2.24) | -0.08 (-2.25, 2.09) | -0.53 (-1.36, 0.29)    | -0.32 (-1.10, 0.46)   | 0.69          |

**Table S4.** Effects of Increasing Potassium on Blood Pressure – Sensitivity Analyses using Last 2 Blood Pressure Measurements or Repeat Measures Analyses (restricted to the subgroup with measurements each week, N=25).

| Difference in mmHg, High versus Low K (95% CI) |    |                     |                     |                     |                             |                            |                             |                             |
|------------------------------------------------|----|---------------------|---------------------|---------------------|-----------------------------|----------------------------|-----------------------------|-----------------------------|
|                                                |    | Each Week           |                     |                     |                             | Repeated Measures Analysis |                             |                             |
| All three measurements, mm Hg                  | N  | Week 1              | Week 2              | Week 3              | Week 4                      | Weeks 1-4                  | Weeks 2-4                   | Weeks 3-4                   |
| Clinic SBP                                     | 25 | -0.96 (-6.84, 4.92) | -2.51 (-7.78, 2.76) | -2.36 (-6.47, 1.75) | -4.21 (-8.49, 0.07)         | -2.52 (-5.65, 0.62)        | -3.02 (-6.08, 0.04)         | <b>-3.24 (-6.43, -0.05)</b> |
| Clinic DBP                                     | 25 | 0.81 (-1.99, 3.61)  | -0.68 (-3.23, 1.87) | -0.01 (-2.26, 2.24) | -0.08 (-2.25, 2.09)         | -0.01 (-1.56, 1.55)        | -0.27 (-1.82, 1.28)         | -0.02 (-1.64, 1.59)         |
| Last two measurements, mmHg                    |    |                     |                     |                     |                             |                            |                             |                             |
| Clinic SBP                                     | 25 | 0.22 (-5.64, 6.08)  | -3.26 (-8.89, 2.37) | -2.45 (-6.98, 2.09) | <b>-4.98 (-9.41, -0.55)</b> | -2.60 (-5.83, 0.62)        | <b>-3.54 (-6.83, -0.25)</b> | <b>-3.64 (-6.92, -0.36)</b> |
| Clinic DBP                                     | 25 | 0.88 (-2.02, 3.78)  | -0.84 (-3.21, 1.53) | 0.61 (-1.77, 2.99)  | 0.06 (-1.95, 2.07)          | 0.15 (-1.38, 1.69)         | -0.08 (-1.60, 1.45)         | 0.35 (-1.20, 1.90)          |

Bold represents a  $P < 0.05$ .
